1  
2  
3  
4  
5  
6  
7  
8  
9  
10 **Identification of Chikungunya virus nucleocapsid core assembly modulators**  
11  
12

13  
14 Sara E. Jones-Burrage<sup>a,±</sup>, Zhenning Tan<sup>a,±,§</sup>, Lichun Li<sup>b,^</sup>, Adam Zlotnick<sup>c</sup>, Suchetana  
15 Mukhopadhyay<sup>a,\*</sup>  
16  
17

18  
19  
20 <sup>a</sup> Indiana University Bloomington, Department of Biology, Bloomington, IN 47405  
21

22 <sup>b</sup> Assembly Biosciences, Bloomington, IN 47405  
23

24 <sup>c</sup> Indiana University Bloomington, Department of Molecular and Cellular Biochemistry,  
25 Bloomington, IN 47405  
26  
27

28  
29 <sup>±</sup> These authors contributed equally to this work  
30

31 <sup>§</sup> Current Address: Aisera Inc., Palo Alto, CA 94304  
32

33 <sup>^</sup> Current Address: Beckman Coulter Life Sciences, Indianapolis, IN, 46268  
34

35 <sup>\*</sup> Corresponding author: Suchetana Mukhopadhyay; Email: [sumukhop@indiana.edu](mailto:sumukhop@indiana.edu); Phone:  
36 812-856-3686  
37  
38  
39  
40  
41  
42  
43  
44  
45  
46  
47  
48  
49  
50  
51  
52  
53  
54  
55  
56

57  
58  
59 **Abstract:**  
60

61 The alphavirus Chikungunya virus is transmitted to humans via infected mosquitos. Most  
62 infected humans experience symptoms which can range from short-term fatigue and fever to  
63 debilitating arthritis that can last for months or years. Some patients relapse and experience  
64 symptoms months or years after the initial bout of disease. The capsid protein of Chikungunya  
65 virus forms a shell around the viral RNA genome; this structure is called the nucleocapsid core.  
66  
67 The core protects the genome during virus transmission and with the correct environmental  
68 trigger, this proteinaceous shell dissociates and releases the viral genome to initiate infection. We  
69 hypothesized that targeting compounds to interfere with the nucleocapsid core's function would  
70 constrain virus spread either by inhibiting the release of viral genomes during entry or by  
71 reducing the number of infectious virus particles assembled. We implemented a high  
72 throughput, *in vitro*, FRET-based assay to monitor nucleic acid packaging by purified  
73 Chikungunya capsid protein as a proxy for nucleocapsid core assembly and disassembly. We  
74 screened 10,000 compounds and found 45 that substantially modulated the assembly of core-like  
75 particles. A subset of compounds was selected to study their effects in virus-infected vertebrate  
76 cells. Our results show that four compounds inhibit infectious virus production by at least 90%  
77 in a dose-dependent manner. The most promising inhibitor was tested and found to reduce the  
78 amount of nucleocapsid cores inside the cell during Chikungunya virus infection. These  
79 compounds could be the foundation for anti-viral therapeutics.  
80  
81  
82  
83  
84  
85  
86  
87  
88  
89  
90  
91  
92  
93  
94  
95  
96  
97  
98  
99

100  
101 **Keywords (6 max):** Chikungunya virus; antiviral compounds; nucleocapsid core; fluorescence  
102 quenching-based high throughput screen  
103  
104  
105  
106  
107  
108  
109  
110  
111  
112

113  
114  
115 **Highlights**  
116

117 • A FRET-based assay to detect nucleic acid packaging by Chikungunya virus capsid protein

118  
119  
120 • Identification of small molecules that modulate core-like particle assembly

121  
122 • A subset of compounds that interfere with in vitro assembly also inhibit Chikungunya virus

123  
124 production in cell culture

125  
126 • Identification of antiviral molecules that may not be identified by assays using reporter viruses

127  
128 • Potential starting compounds for developing direct-acting antivirals  
129  
130  
131  
132  
133  
134  
135  
136  
137  
138  
139  
140  
141  
142  
143  
144  
145  
146  
147  
148  
149  
150  
151  
152  
153  
154  
155  
156  
157  
158  
159  
160  
161  
162  
163  
164  
165  
166  
167  
168

## 1. Introduction

Chikungunya virus (CHIKV) is a re-emerging alphavirus that is spread by a mosquito vector to humans and other vertebrates (1, 2). An estimated 3 million people are affected annually by CHIKV and approximately 80-95% develop symptoms 2 to 12 days after being bitten by an infected mosquito (1, 3, 4). Infected individuals typically suffer from short-term fever, fatigue, and joint pain; however, approximately 25-48% develop long-term debilitating arthritis that can persist for months or years (2, 5, 6). Previously, CHIKV outbreaks were limited to tropical and subtropical Asia and Africa, but outbreaks have now been reported in Europe, North America, South America, and the Caribbean (2). This expansion is due in part to a mutation in a viral protein, which supportstransmission of the virus in both the *Aedes aegypti* and *Aedes albopictus* mosquito vectors (7). A number of inhibitors of CHIKV have been identified including compounds that target the virus lifecycle including genome replication, viral protein synthesis, and virus egress, specifically the interaction of the core with the viral spikes (8-19). These compounds, however, are effective only at high concentrations or resistance is easily acquired. Antiviral compounds that target host factors required by CHIKV reduce viral titers but these compounds are by definition affecting normal cellular function (10, 20-22).

Antivirals that target the functions of capsid proteins of approximately half a dozen other eukaryotic viruses have been successful direct acting antivirals. While the core is modulated in all the inhibitors identified, their mode of action and lifecycle stage varies. Work with polio and dengue viruses (23, 24) show the that when antivirals (V-073 for polio and ST-148 for dengue) target the capsid/core proteins, the virus is less likely to develop drug resistance because the viral capsids/cores will contain both drug-susceptible and drug-resistant capsid proteins. Because of this chimera oligomer, the drug is still effective despite mutations arising. Additional studies

225  
226  
227 have shown that ST-148, is thought to make the dengue core more rigid by promoting capsid  
228 contacts, thus interfering with the packaging and disassembly of viral RNA (25, 26). One could  
229 envision that a dengue core containing even a few core proteins that have stronger contacts with  
230 adjacent subunits would disrupt the overall assembly of the core. Small molecules have been  
231 identified that target Hepatitis B virus capsid assembly (27-31); heteroaryldihydropyrimidines  
232 compounds promote assembly and lead to empty or misassembled particles that have fallen into  
233 kinetic traps (27, 30). In contrast, inhibitors of enteroviruses, such as the WIN compounds for  
234 rhinoviruses, prevent the disassembly of the capsid particle (32, 33). Here, the two most efficient  
235 WIN compounds bind to a pocket in the capsid protein inhibiting breathing and disassembly of  
236 the capsid (33, 34). Two groups of antivirals that target HIV capsid have been identified. Small  
237 molecules will interfere with the virion maturation by targeting the cleavage and rearrangement  
238 of capsid, which is necessary for infectious viron maturation (35-42). The second group of  
239 antivirals interfere with the capsid -capsid protein interactions, and interfere with assembly,  
240 genome packaging, and uncoating (40, 43, 44).  
241  
242  
243  
244  
245  
246  
247  
248  
249  
250  
251  
252  
253  
254  
255  
256

257 CHIKV, like other Alphaviruses (Ross River virus, Venezuelan Equine Encephalitis virus,  
258 Eastern Equine Encephalitis virus) are enveloped, positive-sense RNA viruses (45). Particles  
259 have icosahedral symmetry and are organized with (i) an internal nucleocapsid core, consisting  
260 of the capsid protein and RNA genome, (ii) a host-derived lipid bilayer surrounding this core,  
261 and (iii) a shell of viral glycoproteins on the particle surface which are required for cell entry (46,  
262 47). The capsid protein consists of two domains, a disordered N-terminal domain that interacts  
263 with the viral RNA, and a C-terminal chymotrypsin-like domain that makes up of the outer  
264 surface of the core. The C-terminal domain of capsid protein interacts with the endo domain of  
265  
266  
267  
268  
269  
270  
271  
272  
273  
274  
275  
276  
277  
278  
279  
280

281  
282  
283 one of the viral glycoproteins, E2. The different roles of the capsid protein in the viral lifecycle  
284  
285 require multiple interactions of capsid protein.  
286

287 Assembly of alphavirus nucleocapsid cores can be recapitulated *in vitro*; these are called  
288 core-like particles (CLPs) (48). CLPs can be assembled by mixing recombinant capsid protein  
289 with viral RNA. CLPs are also formed when non-viral cargo (*e.g.*, single-stranded DNA and  
290 RNA oligonucleotides, polyanion small molecules, or gold particles coated with nucleic acid) are  
291 mixed with capsid protein (49). CLPs can be encapsidated by viral glycoproteins, and the newly  
292 formed virus-like particles are able to enter and disassemble within a new cell (50, 51). A 27mer  
293 DNA oligo interacts in a 1:1 molar ratio to neutralize the basic N-terminus of the capsid protein  
294 (52, 53) to initiate CLP assembly. CLPs are 40 nm in diameter and structurally similar to cores  
295 in virions (52-55). The efficiency of CLP assembly can be regulated by ionic strength. Low ionic  
296 strength buffers promote CLP assembly and inhibit CLP disassembly. High ionic strength  
297 buffers will inhibit CLP assembly and will promote CLP disassembly (48-50, 52-54, 56). The  
298 need for anionic cargo and the sensitivity to ionic strength indicate that the capsid protein-capsid  
299 protein interactions during assembly are extremely weak and that assembly depends on  
300 electrostatic interaction with cargo.  
301  
302  
303  
304  
305  
306  
307  
308  
309  
310  
311  
312  
313  
314  
315

316 In this study, we sought to identify small molecule modulators of CHIKV CLP assembly (48,  
317 53, 57). We monitored the fluorescence quenching of fluorophore-labelled oligonucleotides to  
318 monitor nucleic acid packaging. We screened a 10,000 compound library *in vitro*. From the 45  
319 compounds identified *in vitro*, 12 were selected for validation in cell culture with CHIKV. We  
320 report that four compounds could block the production of infectious CHIKV particles by at least  
321 90% in a dose-dependent manner. Furthermore, the compound that reduced titers the most,  
322  
323  
324  
325  
326  
327  
328  
329  
330  
331  
332  
333  
334  
335  
336

337  
338  
339 reduced the amount of cytoplasmic cores present in infected cells, consistent with this compound  
340  
341 targeting the nucleocapsid core during infection.  
342

## 343 344 345 346 **2. Materials and Methods**

### 347 348 *2.1 Capsid and oligomer preparation*

349  
350 The capsid protein from CHIK 181/25 (58) was cloned into the pET29 vector and expressed  
351  
352 in Rosetta2pRARE2 cells as done previously for other alphavirus capsid proteins (17, 18, 48, 54,  
353  
354 59). For ease of purification, we included a 6-His tag at the N-terminus prior to the first amino  
355  
356 acid. Cells were grown at 37°C, when the OD600 was between 0.4-0.6, 1 mM IPTG was added.  
357  
358 Cells were grown for an additional 4 hours. Cells were pelleted and resuspended in 20 mM  
359  
360 sodium phosphate buffer containing 2µg/ml leupeptin, 2 µg/ml aprotinin, and 1mM PMSF to a  
361  
362 final cell density of 0.06-0.08 g/ml (53). Samples were lysed using a cell cracker or a sonicator,  
363  
364 sodium chloride was added to a concentration of 500 mM, and then lysates centrifuged at in a  
365  
366 Beckman JA17 rotor at 23000 x g or 45 minutes at 4°C. Clarified supernatant was applied to a  
367  
368 5ml HisTrap column (GE Lifesciences) and after washing with 5 to 10 column volumes of 20  
369  
370 mM sodium phosphate, pH 7.4, 500 mM NaCl, and 10 mM imidazole until A280 and A260  
371  
372 returned to baseline, the protein was eluted with a similar buffer but with 800 mM imidazole. For  
373  
374 further purification, peak fractions were collected and diluted to 0.25M NaCl with 20 mM  
375  
376 sodium phosphate, pH 7.4. Samples were applied to a HiTrap SP column (GE Lifesciences),  
377  
378 washed with 20 mM HEPES pH 7.4, 0.25 M NaCl, 5 mM EDTA and then eluted from the  
379  
380 column using 20 mM HEPES pH 7.4, 1.3 M NaCl, and 5 mM EDTA. Fractions with an  
381  
382 absorbance substantially above background and an 260/280 absorbance ratios less than 0.6 were  
383  
384 pooled, concentrated with a centricon 10K concentrator, and buffer exchanged into 20 mM  
385  
386  
387  
388  
389  
390  
391  
392

393  
394  
395 HEPES and 150 mM NaCl. The resulting material served as our stock solution. Protein  
396  
397 concentration was determined by measuring absorbance at 280 nm using an extinction  
398  
399 coefficient of  $39\,670\text{ M}^{-1}\text{ cm}^{-1}$ .  
400  
401

## 402 403 404 *2.2 High Throughput Screen*

405  
406 High throughput screen assays were performed at the Chemical Genomics Core Facility at  
407  
408 IUPUI (Indianapolis, IN). Each compound of the Chembridge 10K library (San Diego, CA;  
409  
410 kindly provided by Assembly Biosciences) was prepared as a 1mM stock in 100% DMSO in  
411  
412 384-well plates. We conducted two screens by adjusting the assembly conditions. For the  
413  
414 inhibitor screen, we used a final NaCl concentration of 320 mM to achieve approximately 75%  
415  
416 assembly of CLPs and focused on compounds that inhibited assembly. In the second screen, we  
417  
418 used a final NaCl concentration of 570 mM NaCl to achieve approximately 30% assembly of  
419  
420 CLPs and focused on compounds that promoted assembly. The final reaction for each screen  
421  
422 contained 0.25  $\mu\text{M}$  of capsid protein, 0.25  $\mu\text{M}$  of oligomer, and 10  $\mu\text{M}$  of compound in a total  
423  
424 volume of 25  $\mu\text{l}$  per well in a 384-well plate (Greiner bio one).  
425  
426

427  
428 For the screens, capsid protein stock was diluted to 0.417  $\mu\text{M}$  in either 534.4 or 951.9  $\mu\text{M}$   
429  
430 NaCl in 20 mM HEPES, pH 7.5 buffer. A 27mer oligomer (5'-TACCCACGCTCTCGCAGTCA  
431  
432 TAATTCG) was prepared in 20 mM HEPES, pH 7.5 buffer, without any NaCl. The oligomer  
433  
434 mixture contained unlabeled 27mer, Cy3-5' labeled 27mer, and Cy5-5' labeled 27mer at a 1:2:2  
435  
436 ratio (IDT).  
437

438  
439 For reactions with compounds, 15  $\mu\text{l}$  of 0.417  $\mu\text{M}$  capsid in the appropriate NaCl solution  
440  
441 was first added to each well of a 384-well plates (MultiFlo FA Microplate Dispenser, Bio Tek).  
442  
443 Then, 0.25  $\mu\text{l}$  of compound (1 mM stock in DMSO) was added (Freedom EVO 100 liquid  
444  
445  
446  
447  
448



449  
450  
451 handler, Tecan). After a 5-10 minute incubation at room temperature to initiate compound-  
452  
453 protein interaction, 10  $\mu$ l of the 0.625  $\mu$ M oligomer mixture was added to a final volume of 25  
454  
455  $\mu$ l. Plates were centrifuged briefly and incubated at room temperature for 2 hours in the dark.  
456  
457 Finally, the fluorescence signal was recorded with an EnVision 2102 Multilabel Plate Reader  
458  
459 (Perkin Elmer) with monochromators set to 531 nm excitation and 595 nm emission.  
460  
461

462 Each assay consisted of thirty-two 384 plates and each plate contained a series of controls.  
463  
464 One column (16 wells) controlled for assembly in the presence of increasing ionic strength to  
465  
466 ensure the fluorescence signal inversely correlated to assembly. A second column had assembly  
467  
468 reactions at the salt concentration being used in the assay (320 mM for inhibitors and 570 mM  
469  
470 for promoters) to give a baseline fluorescence signal for 75% assembly and 30% assembly,  
471  
472 respectively. The third and fourth columns contained reactions with maximal assembly (100 mM  
473  
474 NaCl) and minimal assembly (800 mM) to establish the minimum and maximum fluorescence  
475  
476 signals, respectively. Also included were capsid protein/no oligonucleotide controls.  
477  
478  
479  
480

### 481 *2.3 High Throughput Data Analysis*

482

483 HTS data quality was monitored using the standard curve as well as the positive and negative  
484  
485 controls on each plate. Data points were normalized by averaging of all the data points in the  
486  
487 same position across all plates to eliminate systematic instrumental error on specific wells. We  
488  
489 defined potential hits in the following way to minimize random error and allow comparison of  
490  
491 chemical structures: hits are 3 sigma (i.e. 3 standard deviations of the signal distribution) away  
492  
493 from the average of the primary screen and 2 sigma from the average of the secondary screen.  
494  
495 All analysis was performed using the R project for Statistical Computing (60).  
496  
497  
498  
499  
500  
501  
502  
503  
504

## 2.4 Tissue culture reagents

All tissue culture experiments were performed using the baby hamster kidney cell line BHK-21, here referred to as BHK cells. Cells were passaged in minimum essential medium (MEM) supplemented with non-essential amino acids, penicillin-streptomycin, and L-glutamine in 10% fetal bovine serum (Corning Cellgro, Manassas, VA) and grown at 37°C and 5% CO<sub>2</sub>.

## 2.5 Virus preparation and titering

The CHIK 181/25 virus used in this study was a generous gift from Dr. Terence Dermody's lab. Nanoluc was cloned into the hypervariable loop of nsP3, after amino acid 490, or after capsid, as described in the literature (61, 62). Infectious virus was generated as described in (63). Briefly, SacI-linearized CHIK-capsid::nLucFM2 $\alpha$  cDNA plasmid was transcribed into infectious RNA *in vitro* using a synthetic cap analog and SP6 RNA polymerase (New England BioLabs, Ipswich, MA). RNA was electroporated (1500 V, 25  $\mu$ F, 200  $\Omega$ ) into BHK cells resuspended in phosphate-buffered saline (PBS) in a 2-mm cuvette. Upon display of significant cytopathic effect, media were harvested and clarified at 5,000  $\times$  g for 5 min.

Plaque assays, as described in (63), were used to determine the amount of infectious virus present and was measured as plaque-forming units (PFUs) per mL. Briefly, serial dilutions of the media harvested from virus-infected cells were added to BHK monolayers for 1 h at room temperature while rocking gently. Cells were overlaid with 1% low-melt agarose, 1 $\times$  complete MEM, and 10% fetal bovine serum. At 48 hpi 1 mL of complete MEM with 10% FBS was added to each well. Plaques were detected at 72 hpi by formaldehyde fixation and crystal violet staining.

561  
562  
563 *2.6 Compound toxicity in uninfected cells.*  
564

565 BHK cells (30,000 cells/well) were plated into a 96-well plate approximately 24 hours prior  
566 to adding the compounds. The supernatant was aspirated off and 100 $\mu$ l fresh phenol red-free  
567 complete MEM with 10% FBS was added. Then, compounds dissolved in DMSO were added to  
568 a final concentration of 10  $\mu$ M. Plates were incubated for 24 hours at 37°C with 5% CO<sub>2</sub>. Then,  
569 media was aspirated and we assessed ATP levels in cell lysates using the CellTiter-Glo®  
570 Luminescent Cell Viability Assay (Promega). Briefly, 30  $\mu$ L of cell-titer glow reagent was  
571 added to each well and, after 10 minutes, the luminescence was measured using a Synergy H1  
572 plate reader (BioTek).  
573  
574  
575  
576  
577  
578  
579  
580  
581  
582

583  
584  
585 *2.7 Antiviral assays*  
586

587 To test if compounds inhibited infectious virus production, 300,000 BHK cells/well were  
588 plated into 12-well plates approximately 24 hours prior to virus infection. The day of the  
589 infection, the supernatant was aspirated and the CHIK capsid:nLucFM2 $\alpha$  virus was added at an  
590 MOI=0.01 in a final volume of 200  $\mu$ L. After a 1 hour adsorption period at room temperature,  
591 cells were washed twice with PBS to remove unabsorbed virus and then 1 mL of media was  
592 added. Compounds were added either during absorption and/or after washing the cells with PBS  
593 depending on the experiment. For mock-infected cells, DMSO alone was added. For dose  
594 response assays, serial dilutions of each compound were made using DMSO so that the same  
595 volume of DMSO was added to culture media. Twenty-four hours after completion of  
596 adsorption, supernatants were collected and viral titers determined by plaquing the cells on BHK  
597 cells as described above.  
598  
599  
600  
601  
602  
603  
604  
605  
606  
607  
608  
609  
610  
611  
612  
613  
614  
615  
616

## 2.8 qPCR to measure particle numbers

At 24 hrs post infection, supernatants from infected BHK cells were collected and clarified (5000 x g for 5 min at room temperature). Virus concentration was determined by RT-qPCR using 5 µl of each supernatant as template for cDNA synthesis and the method described (64). Primers used were Forward: 5'ggaataaagacggatgatagc and Reverse: 5'ggtcgggaatgaaattttcc. The absolute quantities of viral RNAs were determined using a standard curve of *in vitro* transcribed RNA.

## 2.9 Nucleocapsid core isolation from infected cells

Cytoplasmic cores from virus-infected cells were isolated as described previously (65). Briefly, four 100 mm dishes of BHK cells were infected with CHIK at a MOI=0.1. Virus was allowed to adsorb for one hour and then cells were washed twice with PBS. To two plates, serum-free media and 1% DMSO was added, and to the other two plates, 1 µM 4BSA (in DMSO) in serum-free media was added. Cells were harvested 24 hours post infection, pellets were washed with ice-cold PBS, resuspended in 1 ml of TNE buffer (10 mM TrisCl, pH 7.5 10 mM NaCl, and 20 mM EDTA). Cells were incubated on ice for 20 minutes. The nuclei were removed by spinning at 1000 x g for 10 minutes at 4°C. Supernatants were loaded on 10-40% sucrose gradients in TNE+0.1% Triton X-100 buffer. Gradients were spun in SW41 rotor for 2.5 hours at 32,000 x g at 15°C. Fractions collected and analyzed by western blot (65).

## 3. Results and Discussion

### 3.1 A high throughput screen to identify compounds that modulate core-like particle assembly

673  
674  
675 We chose to identify antiviral compounds that target the CHIKV capsid protein because the  
676  
677 capsid protein must make several crucial interactions to generate infectious virus. The core  
678  
679 protects the viral RNA genome during virus transmission, but must dissociate under the correct  
680  
681 physiological conditions for virus replication (46). In addition, the properly assembled core  
682  
683 interacts with the cytoplasmic domain of the viral glycoprotein E2 (66) suggesting the assembly  
684  
685 of the core is critical for particle budding. *In vitro* assembled CLPs are structurally and  
686  
687 functionally similar to nucleocapsid cores from infected cells (50, 51, 54) making them ideal  
688  
689 systems for studying core assembly (48, 49, 52, 53, 59, 67-69).  
690  
691

692 CLPs can be assembled *in vitro* by mixing equimolar ratios of capsid protein and 27mer  
693  
694 DNA oligomers in the presence of 100 mM NaCl, as previously demonstrated (52). For those  
695  
696 experiments 3  $\mu$ M capsid protein and 3  $\mu$ M oligonucleotide were used. CLPs formed rapidly at  
697  
698 room temperature and were visualized by dynamic light scattering, gel shift assay, and  
699  
700 transmission electron microscopy (48, 53, 54). To examine CLP assembly in a high throughput  
701  
702 format we used a fluorescent output: Cy3- and Cy5-labeled 27mer oligomers were used as cargo  
703  
704 and DNA packaging was observed by fluorescence resonance energy transfer (FRET) for  
705  
706 identification and quantification of CLP assembly (57). When the labeled oligomers are  
707  
708 incorporated into core-like particles, the fluorophores are forced into close proximity to one  
709  
710 another and FRET occurs, resulting in a decrease in the Cy3 emission signal and a corresponding  
711  
712 increase in the Cy5 emission signal (Figure 1). We tested different ratios of unlabeled: Cy-3  
713  
714 labeled: Cy5-labeled 27mer oligomer and found the ratio of 1:2:2, respectively, provided the  
715  
716 largest fluorescence range while minimizing self-quenching due to Cy3-Cy3 and Cy5-Cy5  
717  
718 interactions. We observed that the decrease in Cy3 fluorescence had a greater dynamic range  
719  
720 than the increase in Cy5 fluorescence, thus we used the change in the Cy3 fluorescence as a read-  
721  
722  
723  
724  
725  
726  
727  
728

729  
730  
731 out for oligo packaging and CLP assembly. We found that 1.5  $\mu$ M capsid protein and 1.5  $\mu$ M  
732 total oligomer provided a strong signal to discriminate between packaged and unpackaged DNA.  
733  
734 This ratio still maintained the 1:1 mole ratio while reducing the concentrations of capsid protein  
735  
736 and oligomer used.  
737  
738

739  
740 We used this FRET-based *in vitro* assay (48, 53, 54, 57) to screen 10,000 compounds for  
741  
742 their ability to affect fluorescence as a proxy for their ability to modulate CLP assembly. We  
743  
744 anticipated the following outcomes (Figure 1). Compared to a control, compounds could inhibit  
745  
746 CLP formation resulting in more free nucleotide and higher fluorescence (Figure 1B); they could  
747  
748 promote assembly in the absence or reduced amount of DNA also resulting in higher  
749  
750 fluorescence (Figure 1C); they could enhance the overall amount of assembly resulting in more  
751  
752 oligonucleotide packaging and lower fluorescence (Figure 1D); they could increase the amount  
753  
754 of oligos packaged in a CLP, also resulting in lower fluorescence (Figure 1E). Our screen,  
755  
756 without other assays, does not determine which scenario is occurring, merely that there is a  
757  
758 change in the CLP assembly process.  
759  
760

761  
762 To maximize our chances of identifying assembly enhancing and inhibiting compounds we  
763  
764 screened compounds under two different ionic strength conditions. In the first screen, we used  
765  
766 low ionic strength conditions where packaging was robust and fluorescence suppressed.  
767  
768 Compounds that decrease the packaging of oligomers, thereby raising the fluorescence signal  
769  
770 from Cy3, would be readily identified (Figures 1B and 1C). In the second screen, we used  
771  
772 moderate ionic strength conditions where packaging was reduced and fluorescence higher; this  
773  
774 was used to identify compounds that decrease the fluorescence signal from Cy3, suggesting an  
775  
776 increase in the packaging of oligomers (Figures 1D and 1E).  
777  
778  
779  
780  
781  
782  
783  
784

785  
786  
787 To test the core modulation properties of the compounds, CLP assembly was initiated by  
788 adding the oligomer mixture to purified capsid protein and 10  $\mu$ M compound in the appropriate  
789 ionic strength buffer. In the lower ionic strength screen, we found 70 molecules out of 10,000  
790 that resulted in an increase in Cy3 fluorescence by at least 3 standard deviations from the mean  
791 fluorescence (Figure 2A, dark blue line,  $+3\sigma$ ). In the moderate ionic strength screen, we found  
792 36 compounds that decreased Cy3 fluorescence by at least 3 standard deviations from the mean  
793 fluorescence (Figure 2B, dark green line,  $-3\sigma$ ). From our two screens we had at least 106  
794 compounds with CLP modulating properties *in vitro* (Figures 2A and 2B).  
795  
796  
797  
798  
799  
800  
801  
802  
803

804 There were 19 compounds that increased fluorescence in both the low and moderate ionic  
805 strength screens (Figure 3A). Since the moderate ionic strength screen was not as sensitive to  
806 detecting increased fluorescence, we looked for compounds that increased fluorescence by 2  
807 standard deviations in this screen that also increased fluorescence by 3 standard deviations in the  
808 low ionic strength. In a similar process, 26 compounds that increased fluorescence were  
809 identified in both screens (Figure 3B).  
810  
811  
812  
813  
814  
815  
816

817 We determined the efficacy of the 45 putative antiviral compounds based on *in vitro* dose  
818 response of CLP assembly (Supplemental Figure 1). These assays were performed using  
819 standard conditions of 1.5  $\mu$ M capsid protein, 1.5  $\mu$ M oligomer, and either 320 mM or 570 mM  
820 NaCl. The AC<sub>50</sub> (defined as half-maximal activity concentration) of the compounds ranged from  
821 1 to 9  $\mu$ M. Based on efficacy, 12 compounds, six that increased fluorescence and six that  
822 decreased fluorescence, were selected for further characterization.  
823  
824  
825  
826  
827  
828  
829  
830  
831

### 832 *3.2 Production of CHIKV infectious particles is reduced with core modulating compounds*

833  
834  
835  
836  
837  
838  
839  
840

841  
842  
843 The screen to identify CLP assembly modulators was performed using purified components  
844  
845 to maximize the likelihood of finding a compound that interfered with capsid protein-oligo or  
846  
847 capsid protein-capsid protein interactions rather than an off-target cellular effect. Now we  
848  
849 wanted to determine if the compounds identified as core modulators *in vitro* were also effective  
850  
851 during viral infections in cell culture.  
852

853  
854 The 12 selected compounds were tested for toxicity and antiviral efficacy. To test toxicity,  
855  
856 we cultured BHK cells in the presence of 10  $\mu$ M of each compound for 24 hours and then (i)  
857  
858 assessed cell health by measuring cellular ATP levels using a commercial luciferase-based assay  
859  
860 and (ii) assessed cellular morphology by microscopy. The 24-hour time point was selected  
861  
862 because CHIKV-infected BHK cells show cytopathic effect at this time post-infection. At 10  
863  
864  $\mu$ M, eight compounds were tolerated well by cells and showed ATP levels similar to control  
865  
866 cells treated with DMSO (Figure 4). In contrast, compounds MA, NTU, NDBA, and 4PBSA  
867  
868 were detrimental to cells based on reduced levels of ATP and altered cellular morphology.  
869  
870

871  
872 Based on these findings, we only tested the eight non-toxic compounds (4CA, 4BA, 1PA,  
873  
874 7AA, 4BSA, NNU, 2P, and 2CA) for their ability to inhibit infectious CHIK virus production.  
875  
876 We performed a series of experiments where the time at which the compounds were added was  
877  
878 varied relative to CHIK virus adsorption: BHK cells were incubated with the compounds  
879  
880 continuously (Figure 5A), only after viral adsorption (Figure 5B), or only during viral adsorption  
881  
882 (Figure 5C). In all cases, supernatants from each of these experiments were collected 24 hours  
883  
884 post virus infection and assessed for infectious virus by plaque assays. All eight of the  
885  
886 compounds had anti-viral activity (Figure 5), albeit to differing extents depending on when the  
887  
888 compound was added during the infection.  
889  
890  
891  
892  
893  
894  
895  
896



897  
898  
899  
900  
901  
902  
903  
904  
905  
906  
907  
908  
909  
910  
911  
912  
913  
914  
915  
916  
917  
918  
919  
920  
921  
922  
923  
924  
925  
926  
927  
928  
929  
930  
931  
932  
933  
934  
935  
936  
937  
938  
939  
940  
941  
942  
943  
944  
945  
946  
947  
948  
949  
950  
951  
952

When 10  $\mu$ M of compound was incubated with CHIKV-infected BHK cells continuously (Figure 5A), all eight compounds inhibited infectious virus production by at least 50% when compared to the DMSO-treated control cells. Compound 4BSA was the most potent inhibitor of infectious virus production and suppressed viral titer by at least 90%. When compounds were added to cells after virus absorption (Figure 5B), they all reduced the amount of infectious virus produced by at least 50%, except for 4CA and 5NSBA. In the final time-of-addition experiment, we treated BHK cells with compound for only 1 hour during absorption of the virus (Figure 5C) and found that compounds 5NSBA, 1PA, and 7AA were much less effective and no longer inhibited production of infectious virus by 50%.

The eight compounds that exhibited antiviral activity were identified from the screen that only contained capsid protein and oligomer. Therefore, we hypothesized the compounds primarily interfere with an aspect of core assembly or disassembly. We cannot say if the antivirals interfere with capsid-nucleic acid, capsid protein-capsid protein, or both types of interactions. The time of addition experiments may suggest whether the compounds could affect early steps in infection (e.g. disassembly) or late steps (e. g. assembly) or at multiple steps. We hypothesize that compounds that led to higher fluorescence inhibit new core assembly and thus limit production of infectious virus. Compounds 1PA and 7AA were consistent with this idea. They were only an effective antiviral if added continuously or after virus absorption (Figure 5A, 5B), and much of the antiviral activity was lost if this compound was added only during virus absorption (Figure 5C). Compounds 4BA and 4CA were antivirals regardless of time of addition. Compounds that led to lower fluorescence were hypothesized to inhibit nucleocapsid core disassembly, an earlier part of the virus life cycle. Our results show 4BSA, NNU, and 2CA were effective antivirals even when added only during virus absorption (Figure 5C) consistent with

953  
954  
955 these compounds acting during an early step of the viral life cycle. 5NBSA worked the best  
956  
957 when added continuously, perhaps working post-disassembly.  
958

959  
960 Plaque assays reproducibly showed that eight of the compounds identified in our screen  
961  
962 inhibited production of infectious virus (multiple independent virus preparations) (Figure 5).  
963  
964 Many high throughput screens that identify new antiviral compounds use reporter-based assays  
965  
966 to quickly look for a 50-75% reduction in reporter activity (8-11). We initially sought to confirm  
967  
968 the antiviral activity of all our compounds by using luciferase reporter viruses. We inserted  
969  
970 luciferase into either a hypervariable loop of nsP3 (nsP3:luciferase) or after capsid protein  
971  
972 (capsid:luciferase) (61, 62). CHIKV containing the luciferase reporter was added at an  
973  
974 MOI=0.01 and rocked for 1 hour. Then the cells were washed and each of the eight compounds  
975  
976 was added with fresh media. After 6 or 9 hours when using the nsP3:luciferase or  
977  
978 capsid:luciferase virus (when maximum signal was observed), cells were lysed and luciferase  
979  
980 activity determined. In our hands, most of the eight antiviral candidates failed to yield consistent  
981  
982 luciferase activity results, thereby making it difficult to estimate the effect of the compounds  
983  
984 (Supplemental Figure 2). Only 4BSA consistently and reproducibly inhibited the luciferase  
985  
986 activity while the other antiviral compounds found in our screen had much wider variation. We  
987  
988 found the reporter assay was biased towards identifying compounds that would inhibit entry and  
989  
990 replication since time points were taken relatively early in the viral lifecycle. These data suggest  
991  
992 that compounds that target the later stages of assembly such as core assembly, particle assembly,  
993  
994 and have subsequent effects in particle spread, may be missed in this type of reporter screen.  
995  
996  
997  
998  
999

### 1000 *3.3 Efficacy of antiviral compounds in CHIKV infection*

1001  
1002  
1003  
1004  
1005  
1006  
1007  
1008

1009  
1010  
1011 We next tested the dose-dependence inhibition of our most inhibitory compounds (4BA,  
1012 1PA, 4BSA, and NUU) to estimate their EC<sub>50</sub> or the half-maximal effective concentration.  
1013  
1014 Following the addition scheme of Figure 5B, cells were treated with different concentrations of  
1015  
1016 compound after virus adsorption for one hour. EC<sub>50</sub> values for 4BA was 0.94 μM, 1PA was 1.19  
1017  
1018 μM, 4BSA was 0.73 μM, and NUU was 1.23 μM (Figure 6). When we compare these values to  
1019  
1020 what was observed in our initial *in vitro* assays, we see that similar concentrations of compound  
1021  
1022 are required to obtain inhibition of infectious particles in cell culture and CLP assembly *in vitro*.  
1023  
1024 We see 0.94 vs 1.73 μM for compound 4BA, 1.19 vs. 1.75 μM for 1PA, 0.73 vs. 2.44 μM for  
1025  
1026 4BSA, and 1.23 vs 5.34 μM for NNU when comparing the *in vivo* to the *in vitro* dose responses  
1027  
1028 (Figure 6 and Supplementary Figure 1). The largest difference between *in vivo* and *in vitro*  
1029  
1030 studies was an approximately 4-fold difference for NNU.  
1031  
1032  
1033  
1034

1035 The EC<sub>50</sub> observed by our study (Figure 6) indicate that four compounds are promising leads.  
1036  
1037 Several groups have studied the antiviral properties of dioxane and its derivatives which bind in  
1038  
1039 the hydrophobic pocket of capsid protein and subsequently interfere with the capsid-E2  
1040  
1041 interaction (17-19). Like Sharma *et al.* saw with CHIKV and picolic, we observed the best  
1042  
1043 inhibition when 4BSA and virus were added simultaneously. However, they reported that 2 mM  
1044  
1045 of picolic acid was needed to inhibit infectious virus production by 50-60% (19); in contrast,  
1046  
1047 <2μM of the four compounds identified by our study was needed to reduce infectious virus  
1048  
1049 production by 50%.  
1050  
1051  
1052  
1053  
1054

### 1055 3.4 Core assembly is targeted by compound 4BSA

1056 The four compounds that we focused on reduced the number of infectious particles released  
1057  
1058 during a virus infection. Their effectiveness depends on the time of their addition, and their EC<sub>50</sub>  
1059  
1060  
1061  
1062  
1063  
1064

1065  
1066  
1067 values range from 0.7-1.25  $\mu$ M. Our initial screen looked at modulators of core assembly. Our  
1068  
1069 best inhibitor, based on dose response and inhibition of infectious virus, was 4BSA. To  
1070  
1071 determine if 4BSA inhibited core assembly in CHIKV-infected cells, we examined lysate from  
1072  
1073 infected cells with and without compound via centrifugation through a sucrose gradient (65).  
1074  
1075 During a CHIKV infection, nucleocapsid cores form in the cytoplasm and are then enveloped by  
1076  
1077 the viral glycoproteins and bud from the cell. Fractions from the gradient were analyzed by  
1078  
1079 western blot probing for capsid proteins. Virus-infected cells show capsid protein at the top and  
1080  
1081 midway through the sucrose gradient (Figure 7, left panel), consistent with free protein and  
1082  
1083 assembled cytoplasmic cores (65). In contrast, cells treated with 4BSA did not form detectable  
1084  
1085 amounts of cores (Figure 7, right panel). The low overall abundance of capsid protein in cells  
1086  
1087 treated with virus and 4BSA could be the cumulative result of 4BSA activity interfering with the  
1088  
1089 initial disassembly of the virus core, reducing viral replication and new virion propagation, and  
1090  
1091 decreasing amounts of viral spread.  
1092  
1093

1094  
1095 Viral genomes are present in both infectious and non-infectious particles. To determine if the  
1096  
1097 total amount of particles released was altered in the presence of these compound, we determined  
1098  
1099 the genome copies in released CHIKV. CHIKV was added to cells and after adsorption,  
1100  
1101 compound was added, similar to Figure 5B. After 24 hours, media was collected and assayed by  
1102  
1103 qRT-PCR (Figure 6). All four compounds affected the yield of total particles by less than one-  
1104  
1105 log though infectious particles decreased by more than 1-log. These results suggest that viral  
1106  
1107 genome are packaged in the presence of compound but the genome is not able to infect new  
1108  
1109 cells.  
1110  
1111  
1112  
1113  
1114  
1115  
1116  
1117  
1118  
1119  
1120

#### 4. Conclusions

In summary, we used a novel FRET-based assay to screen 10,000 compounds for their ability to inhibit or promote assembly of core-like particles. Of the initial 106 hits, eight compounds were further assessed due to their potent *in vitro* dose response and their lack of cellular toxicity. From this group, we identified four compounds that could reduce production of infectious virus by at least 1-log and at least one of these compounds interferes with nucleocapsid core assembly *in vivo*. These results indicate that compounds with the ability to modulate core-like particle assembly also have potent antiviral activity. Our work adds to the growing body of evidence that suggest that targeting the capsid protein is an effective strategy to find new antivirals.

#### 5. Acknowledgments

We thank members of the Mukhopadhyay and Zlotnick lab for scientific discussions. This work was supported by Assembly Biosciences (SM). AZ associated with biotechnology companies that focus on Hepatitis B virus.

1177  
1178  
1179  
1180  
1181  
1182  
1183  
1184  
1185  
1186  
1187  
**Figure Legends**

**Figure 1 – Schematic of the expected outcomes of the FRET-based assay for nucleic acid packaging in CLPs.** (A) CLP assay using purified capsid protein and fluorescently labeled DNA oligos that provides the baseline fluorescence. (B-E) Expected outcomes of how fluorescence signal could increase representing less overall oligo packaged (B and C) or decrease representing more overall oligo packaged (D and E) in the presence of added compound.

1188  
1189  
1190  
1191  
1192  
1193  
1194  
**Figure 2 – Distribution of normalized fluorescence values from both screens.** (A) Screen performed at low ionic strength and (B) at moderate strength. Increased fluorescence values  $1\sigma$ ,  $2\sigma$ , and  $3\sigma$  from the average shown in shades of blue (lightest to darkest, respectively) and decreased fluorescence values with  $1\sigma$ ,  $2\sigma$ , and  $3\sigma$  from the average shown in shades of green (lightest to darkest, respectively). Actual number of hits and percentage of the total shown to the right of each histogram.

1195  
1196  
1197  
1198  
1199  
1200  
1201  
1202  
1203  
**Figure 3 – Forty-five modulators of CLP assembly that were selected for further study.** (A) 19 compounds identified in both the low and moderate ionic strength screen increased fluorescence during CLP assembly. Compounds  $3\sigma$  above the normalized fluorescence in the low ionic strength screen was compared to compound  $2\sigma$  above the normalized fluorescence in the moderate ionic strength. (B) 26 compounds that decreased fluorescence identified in both screens. Here, the cut-off of  $3\sigma$  was used in the moderate ionic strength and  $2\sigma$  from the low ionic strength screen.

1204  
1205  
1206  
1207  
1208  
1209  
1210  
1211  
1212  
**Figure 4 – Toxicity assessment of compounds in cell culture.** BHK cells were incubated with  $10\ \mu\text{M}$  of compound only for 24 hours and then ATP levels were assessed using Cell Titer Glow. Compounds that increase fluorescence, possible assembly inhibitors, are shown with gray bars; compounds that decrease fluorescence, possible assembly enhancers, are shown with black bars. Cells incubated with virus and DMSO served as positive and negative controls, respectively. These data are the averages of 3 independent experiments performed in triplicate. Error bars indicate the standard deviation

1213  
1214  
1215  
1216  
1217  
1218  
1219  
1220  
1221  
1222  
**Figure 5 – Antiviral activity of compounds as a function of their time-of-addition.** BHK cells were infected with CHIKV and  $10\ \mu\text{M}$  of compound was added (A) continuously, (B) after virus absorption, or (C) during absorption of the virus. In left panel, compounds that increase fluorescence are shown with gray bars; compounds that decrease fluorescence are shown with black bars. In the experimental flowchart (right panels), the gray arrow indicates when compound was added. Supernatants were collected 24 hpi and plaque assays were used to determine the amounts of infectious virus. These data are averaged from three independent experiments. Error bars indicate the standard deviation.

1223  
1224  
1225  
1226  
1227  
1228  
1229  
1230  
1231  
1232  
**Figure 6 – Four compounds have  $\text{EC}_{50}$  values in the  $\mu\text{M}$  range *in vivo*.** BHK cells were infected with CHIKV and  $10\ \mu\text{M}$  of compound (A) 4BA, (B) 1PA, (C) 4BSA, and (D) NNU. was added immediately after virus absorption. Supernatants were collected 24 hpi for plaque assays.  $\text{EC}_{50}$  values were  $0.94\ \mu\text{M}$  for 4BA,  $1.19\ \mu\text{M}$  for 1PA,  $0.73\ \mu\text{M}$  for 4BSA, and  $1.23\ \mu\text{M}$  for NNU. These representative data are from one of three independent experiments. Why do 4BA and 1PA only go to about 20%?

1233  
1234  
1235  
1236  
1237  
1238  
1239  
1240  
1241  
1242  
1243  
1244  
1245  
1246  
1247  
1248  
1249  
1250  
1251  
1252  
1253  
1254  
1255  
1256  
1257  
1258  
1259  
1260  
1261  
1262  
1263  
1264  
1265  
1266  
1267  
1268  
1269  
1270  
1271  
1272  
1273  
1274  
1275  
1276  
1277  
1278  
1279  
1280  
1281  
1282  
1283  
1284  
1285  
1286  
1287  
1288

**Figure 7 – 4BSA inhibits nucleocapsid core assembly in CHIKV-infected cells.** BHK cells were infected with CHIKV and either DMSO (left) or 10  $\mu$ M of 4BSA (right) was added immediately after virus absorption. Cells were lysed and nucleocapsid cores were isolated by density centrifugation. Fractions were collected and assessed for the presence of capsid protein by western blot. These representative data are from one of two independent experiments.

**Figure 8 – Total number of virus particles released are slightly affected by the presence of compound.** BHK cells were infected with CHIKV and 10  $\mu$ M of compound was added immediately after virus absorption (similar to Figure 5B). Compounds that increase fluorescence are shown with gray bars; compounds that decrease fluorescence are shown with black bars. Supernatants were collected 24 hpi for qPCR studies. These data are averaged from three independent experiments. Error bars indicate the standard deviation.



References:

1. **Ganesan VK, Duan B, Reid SP.** 2017. Chikungunya Virus: Pathophysiology, Mechanism, and Modeling. *Viruses* **9**.
2. **Patterson J, Sammon M, Garg M.** 2016. Dengue, Zika and Chikungunya: Emerging Arboviruses in the New World. *West J Emerg Med* **17**:671-679.
3. **Goupil BA, Mores CN.** 2016. A Review of Chikungunya Virus-induced Arthralgia: Clinical Manifestations, Therapeutics, and Pathogenesis. *Open Rheumatol J* **10**:129-140.
4. **Powers AM.** 2018. Vaccine and Therapeutic Options To Control Chikungunya Virus. *Clin Microbiol Rev* **31**.
5. **McCarthy MK, Davenport BJJ, Morrison TE.** 2019. Chronic Chikungunya Virus Disease. *Curr Top Microbiol Immunol* doi:10.1007/82\_2018\_147.
6. **Silva LA, Dermody TS.** 2017. Chikungunya virus: epidemiology, replication, disease mechanisms, and prospective intervention strategies. *J Clin Invest* **127**:737-749.
7. **Tsetsarkin KA, Vanlandingham DL, McGee CE, Higgs S.** 2007. A single mutation in chikungunya virus affects vector specificity and epidemic potential. *PLoS Pathog* **3**:e201.
8. **Feibelman KM, Fuller BP, Li L, LaBarbera DV, Geiss BJ.** 2018. Identification of small molecule inhibitors of the Chikungunya virus nsP1 RNA capping enzyme. *Antiviral Res* **154**:124-131.
9. **Pohjala L, Utt A, Varjak M, Lulla A, Merits A, Ahola T, Tammela P.** 2011. Inhibitors of alphavirus entry and replication identified with a stable Chikungunya replicon cell line and virus-based assays. *PLoS One* **6**:e28923.
10. **Ching KC, L FPN, Chai CLL.** 2017. A compendium of small molecule direct-acting and host-targeting inhibitors as therapies against alphaviruses. *J Antimicrob Chemother* **72**:2973-2989.
11. **Das PK, Puusepp L, Varghese FS, Utt A, Ahola T, Kananovich DG, Lopp M, Merits A, Karelson M.** 2016. Design and Validation of Novel Chikungunya Virus Protease Inhibitors. *Antimicrob Agents Chemother* **60**:7382-7395.
12. **Abdelnabi R, Neyts J, Delang L.** 2017. Chikungunya virus infections: time to act, time to treat. *Curr Opin Virol* **24**:25-30.
13. **Abdelnabi R, Neyts J, Delang L.** 2016. Antiviral Strategies Against Chikungunya Virus. *Methods Mol Biol* **1426**:243-253.
14. **Ehteshami M, Tao S, Zandi K, Hsiao HM, Jiang Y, Hammond E, Amblard F, Russell OO, Merits A, Schinazi RF.** 2017. Characterization of beta-d-N(4)-Hydroxycytidine as a Novel Inhibitor of Chikungunya Virus. *Antimicrob Agents Chemother* **61**.
15. **Kaur P, Thiruchelvan M, Lee RC, Chen H, Chen KC, Ng ML, Chu JJ.** 2013. Inhibition of chikungunya virus replication by harringtonine, a novel antiviral that suppresses viral protein expression. *Antimicrob Agents Chemother* **57**:155-167.
16. **Varghese FS, Kaukinen P, Glasker S, Bernalov M, Hanski L, Wennerberg K, Kummerer BM, Ahola T.** 2016. Discovery of berberine, abamectin and ivermectin as antivirals against chikungunya and other alphaviruses. *Antiviral Res* **126**:117-124.
17. **Sharma R, Kesari P, Kumar P, Tomar S.** 2018. Structure-function insights into chikungunya virus capsid protein: Small molecules targeting capsid hydrophobic pocket. *Virology* **515**:223-234.
18. **Aggarwal M, Tapas S, Preeti, Siwach A, Kumar P, Kuhn RJ, Tomar S.** 2012. Crystal structure of aura virus capsid protease and its complex with dioxane: new insights into capsid-glycoprotein molecular contacts. *PLoS One* **7**:e51288.



- 1345  
1346  
1347  
1348  
1349  
1350  
1351  
1352  
1353  
1354  
1355  
1356  
1357  
1358  
1359  
1360  
1361  
1362  
1363  
1364  
1365  
1366  
1367  
1368  
1369  
1370  
1371  
1372  
1373  
1374  
1375  
1376  
1377  
1378  
1379  
1380  
1381  
1382  
1383  
1384  
1385  
1386  
1387  
1388  
1389  
1390  
1391  
1392  
1393  
1394  
1395  
1396  
1397  
1398  
1399  
1400
19. **Sharma R, Fatma B, Saha A, Bajpai S, Sistla S, Dash PK, Parida M, Kumar P, Tomar S.** 2016. Inhibition of chikungunya virus by picolinate that targets viral capsid protein. *Virology* **498**:265-276.
  20. **Ashbrook AW, Lentscher AJ, Zamora PF, Silva LA, May NA, Bauer JA, Morrison TE, Dermody TS.** 2016. Antagonism of the Sodium-Potassium ATPase Impairs Chikungunya Virus Infection. *MBio* **7**.
  21. **Lundberg L, Pinkham C, de la Fuente C, Brahms A, Shafagati N, Wagstaff KM, Jans DA, Tamir S, Kehn-Hall K.** 2016. Selective Inhibitor of Nuclear Export (SINE) Compounds Alter New World Alphavirus Capsid Localization and Reduce Viral Replication in Mammalian Cells. *PLoS Negl Trop Dis* **10**:e0005122.
  22. **Lundberg L, Pinkham C, Baer A, Amaya M, Narayanan A, Wagstaff KM, Jans DA, Kehn-Hall K.** 2013. Nuclear import and export inhibitors alter capsid protein distribution in mammalian cells and reduce Venezuelan Equine Encephalitis Virus replication. *Antiviral Res* **100**:662-672.
  23. **Mateo R, Nagamine CM, Kirkegaard K.** 2015. Suppression of Drug Resistance in Dengue Virus. *MBio* **6**:e01960-01915.
  24. **Tanner EJ, Liu HM, Oberste MS, Pallansch M, Collett MS, Kirkegaard K.** 2014. Dominant drug targets suppress the emergence of antiviral resistance. *Elife* **3**.
  25. **Byrd CM, Dai D, Grosenbach DW, Berhanu A, Jones KF, Cardwell KB, Schneider C, Wineinger KA, Page JM, Harver C, Stavale E, Tyavanagimatt S, Stone MA, Bartenschlager R, Scaturro P, Hruby DE, Jordan R.** 2013. A novel inhibitor of dengue virus replication that targets the capsid protein. *Antimicrob Agents Chemother* **57**:15-25.
  26. **Scaturro P, Trist IM, Paul D, Kumar A, Acosta EG, Byrd CM, Jordan R, Brancale A, Bartenschlager R.** 2014. Characterization of the mode of action of a potent dengue virus capsid inhibitor. *J Virol* **88**:11540-11555.
  27. **Deres K, Schroder CH, Paessens A, Goldmann S, Hacker HJ, Weber O, Kramer T, Niewohner U, Pleiss U, Stoltefuss J, Graef E, Koletzki D, Masantschek RN, Reimann A, Jaeger R, Gross R, Beckermann B, Schlemmer KH, Haebich D, Rubsamen-Waigmann H.** 2003. Inhibition of hepatitis B virus replication by drug-induced depletion of nucleocapsids. *Science* **299**:893-896.
  28. **Stray SJ, Zlotnick A.** 2006. BAY 41-4109 has multiple effects on Hepatitis B virus capsid assembly. *J Mol Recognit* **19**:542-548.
  29. **Stray SJ, Bourne CR, Punna S, Lewis WG, Finn MG, Zlotnick A.** 2005. A heteroaryldihydropyrimidine activates and can misdirect hepatitis B virus capsid assembly. *Proc Natl Acad Sci U S A* **102**:8138-8143.
  30. **Bourne CR, Finn MG, Zlotnick A.** 2006. Global structural changes in hepatitis B virus capsids induced by the assembly effector HAP1. *J Virol* **80**:11055-11061.
  31. **Katen SP, Chirapu SR, Finn MG, Zlotnick A.** 2010. Trapping of hepatitis B virus capsid assembly intermediates by phenylpropenamide assembly accelerators. *ACS Chem Biol* **5**:1125-1136.
  32. **Smith TJ, Kremer MJ, Luo M, Vriend G, Arnold E, Kamer G, Rossmann MG, McKinlay MA, Diana GD, Otto MJ.** 1986. The site of attachment in human rhinovirus 14 for antiviral agents that inhibit uncoating. *Science* **233**:1286-1293.
  33. **Li Y, Zhou Z, Post CB.** 2005. Dissociation of an antiviral compound from the internal pocket of human rhinovirus 14 capsid. *Proc Natl Acad Sci U S A* **102**:7529-7534.
  34. **Lewis JK, Bothner B, Smith TJ, Siuzdak G.** 1998. Antiviral agent blocks breathing of the common cold virus. *Proc Natl Acad Sci U S A* **95**:6774-6778.
  35. **Sticht J, Humbert M, Findlow S, Bodem J, Muller B, Dietrich U, Werner J, Krausslich HG.** 2005. A peptide inhibitor of HIV-1 assembly in vitro. *Nat Struct Mol Biol* **12**:671-677.
  36. **Adamson CS, Freed EO.** 2010. Novel approaches to inhibiting HIV-1 replication. *Antiviral Res* **85**:119-141.

- 1401  
1402  
1403  
1404  
1405  
1406  
1407  
1408  
1409  
1410  
1411  
1412  
1413  
1414  
1415  
1416  
1417  
1418  
1419  
1420  
1421  
1422  
1423  
1424  
1425  
1426  
1427  
1428  
1429  
1430  
1431  
1432  
1433  
1434  
1435  
1436  
1437  
1438  
1439  
1440  
1441  
1442  
1443  
1444  
1445  
1446  
1447  
1448  
1449  
1450  
1451  
1452  
1453  
1454  
1455  
1456
37. **Timilsina U, Ghimire D, Timalina B, Nitz TJ, Wild CT, Freed EO, Gaur R.** 2016. Identification of potent maturation inhibitors against HIV-1 clade C. *Sci Rep* **6**:27403.
  38. **Waki K, Durell SR, Soheilian F, Nagashima K, Butler SL, Freed EO.** 2012. Structural and functional insights into the HIV-1 maturation inhibitor binding pocket. *PLoS Pathog* **8**:e1002997.
  39. **Li F, Goila-Gaur R, Salzwedel K, Kilgore NR, Reddick M, Matallana C, Castillo A, Zoumplis D, Martin DE, Orenstein JM, Allaway GP, Freed EO, Wild CT.** 2003. PA-457: a potent HIV inhibitor that disrupts core condensation by targeting a late step in Gag processing. *Proc Natl Acad Sci U S A* **100**:13555-13560.
  40. **Lemke CT, Titolo S, von Schwedler U, Goudreau N, Mercier JF, Wardrop E, Faucher AM, Coulombe R, Banik SS, Fader L, Gagnon A, Kawai SH, Rancourt J, Tremblay M, Yoakim C, Simoneau B, Archambault J, Sundquist WI, Mason SW.** 2012. Distinct effects of two HIV-1 capsid assembly inhibitor families that bind the same site within the N-terminal domain of the viral CA protein. *J Virol* **86**:6643-6655.
  41. **Wang W, Zhou J, Halambage UD, Jurado KA, Jamin AV, Wang Y, Engelman AN, Aiken C.** 2017. Inhibition of HIV-1 Maturation via Small-Molecule Targeting of the Amino-Terminal Domain in the Viral Capsid Protein. *J Virol* **91**.
  42. **Xu JP, Francis AC, Meuser ME, Mankowski M, Ptak RG, Rashad AA, Melikyan GB, Cocklin S.** 2018. Exploring Modifications of an HIV-1 Capsid Inhibitor: Design, Synthesis, and Mechanism of Action. *J Drug Des Res* **5**.
  43. **Yant SR, Mulato A, Stepan G, Villasenor AG, Jin D, Margot NA, Ahmadyar S, Ram RR, Somoza JR, Singer E, Wong M, Xu Y, Link JO, Cihlar T, Tse WC.** 2019. GS-6207, A POTENT AND SELECTIVE FIRST-IN-CLASS LONG-ACTING HIV-1 CAPSID INHIBITOR, abstr CROI Conference on Retroviruses and Opportunistic Infections, Seattle, Washington,
  44. **Bhattacharya A, Alam SL, Fricke T, Zadrozny K, Sedzicki J, Taylor AB, Demeler B, Pornillos O, Ganser-Pornillos BK, Diaz-Griffero F, Ivanov DN, Yeager M.** 2014. Structural basis of HIV-1 capsid recognition by PF74 and CPSF6. *Proc Natl Acad Sci U S A* **111**:18625-18630.
  45. **Kuhn RJ.** 2013. Chapter 22: Togaviridae, p 629-650. *In* Knipe DM, Howley PM (ed), *Fields' Virology*. Lippincott Williams & Wilkins, Philadelphia.
  46. **Jose J, Snyder JE, Kuhn RJ.** 2009. A structural and functional perspective of alphavirus replication and assembly. *Future Microbiol* **4**:837-856.
  47. **Zhang W, Mukhopadhyay S, Pletnev SV, Baker TS, Kuhn RJ, Rossmann MG.** 2002. Placement of the structural proteins in Sindbis virus. *J Virol* **76**:11645-11658.
  48. **Tellinghuisen TL, Hamburger AE, Fisher BR, Ostendorp R, Kuhn RJ.** 1999. In vitro assembly of alphavirus cores by using nucleocapsid protein expressed in *Escherichia coli*. *J Virol* **73**:5309-5319.
  49. **Cheng F, Tsvetkova IB, Khuong YL, Moore AW, Arnold RJ, Goicochea NL, Dragnea B, Mukhopadhyay S.** 2013. The packaging of different cargo into enveloped viral nanoparticles. *Mol Pharm* **10**:51-58.
  50. **Cheng F, Mukhopadhyay S.** 2011. Generating enveloped virus-like particles with in vitro assembled cores. *Virology* **413**:153-160.
  51. **Snyder JE, Azizgolshani O, Wu B, He Y, Lee AC, Jose J, Suter DM, Knobler CM, Gelbart WM, Kuhn RJ.** 2011. Rescue of infectious particles from preassembled alphavirus nucleocapsid cores. *J Virol* **85**:5773-5781.
  52. **Wang JC, Chen C, Rayaprolu V, Mukhopadhyay S, Zlotnick A.** 2015. Self-Assembly of an Alphavirus Core-like Particle Is Distinguished by Strong Intersubunit Association Energy and Structural Defects. *ACS Nano* **9**:8898-8906.
  53. **Rayaprolu V, Moore A, Wang JC, Goh BC, Perilla JR, Zlotnick A, Mukhopadhyay S.** 2017. Length of encapsidated cargo impacts stability and structure of in vitro assembled alphavirus core-like particles. *J Phys Condens Matter* **29**:484003.

- 1457  
1458  
1459  
1460  
1461  
1462  
1463  
1464  
1465  
1466  
1467  
1468  
1469  
1470  
1471  
1472  
1473  
1474  
1475  
1476  
1477  
1478  
1479  
1480  
1481  
1482  
1483  
1484  
1485  
1486  
1487  
1488  
1489  
1490  
1491  
1492  
1493  
1494  
1495  
1496  
1497  
1498  
1499  
1500  
1501  
1502  
1503  
1504  
1505  
1506  
1507  
1508  
1509  
1510  
1511  
1512
54. **Mukhopadhyay S, Chipman PR, Hong EM, Kuhn RJ, Rossmann MG.** 2002. In vitro-assembled alphavirus core-like particles maintain a structure similar to that of nucleocapsid cores in mature virus. *J Virol* **76**:11128-11132.
  55. **Wang JC, Mukhopadhyay S, Zlotnick A.** 2018. Geometric Defects and Icosahedral Viruses. *Viruses* **10**.
  56. **Goicochea NL, De M, Rotello VM, Mukhopadhyay S, Dragnea B.** 2007. Core-like particles of an enveloped animal virus can self-assemble efficiently on artificial templates. *Nano Lett* **7**:2281-2290.
  57. **Zlotnick A, Vieweger S.** 2019. Generalizable Assay For Virus Capsid Assembly. USA patent 10,208,358.
  58. **Ashbrook AW, Burrack KS, Silva LA, Montgomery SA, Heise MT, Morrison TE, Dermody TS.** 2014. Residue 82 of the Chikungunya virus E2 attachment protein modulates viral dissemination and arthritis in mice. *J Virol* **88**:12180-12192.
  59. **Hong EM, Perera R, Kuhn RJ.** 2006. Alphavirus capsid protein helix I controls a checkpoint in nucleocapsid core assembly. *J Virol* **80**:8848-8855.
  60. **Team RC.** 2013. R: A language and environment for statistical computing. <http://www.R-project.org/>. Accessed
  61. **Kummerer BM, Grywna K, Glasker S, Wieseler J, Drosten C.** 2012. Construction of an infectious Chikungunya virus cDNA clone and stable insertion of mCherry reporter genes at two different sites. *J Gen Virol* **93**:1991-1995.
  62. **Sun C, Gardner CL, Watson AM, Ryman KD, Klimstra WB.** 2014. Stable, high-level expression of reporter proteins from improved alphavirus expression vectors to track replication and dissemination during encephalitic and arthritogenic disease. *J Virol* **88**:2035-2046.
  63. **Ramsey J, Renzi EC, Arnold RJ, Trinidad JC, Mukhopadhyay S.** 2017. Palmitoylation of Sindbis Virus TF Protein Regulates Its Plasma Membrane Localization and Subsequent Incorporation into Virions. *J Virol* **91**.
  64. **Sokoloski KJ, Hayes CA, Dunn MP, Balke JL, Hardy RW, Mukhopadhyay S.** 2012. Sindbis virus infectivity improves during the course of infection in both mammalian and mosquito cells. *Virus Res* **167**:26-33.
  65. **Lopez S, Yao JS, Kuhn RJ, Strauss EG, Strauss JH.** 1994. Nucleocapsid-glycoprotein interactions required for assembly of alphaviruses. *J Virol* **68**:1316-1323.
  66. **Brown RS, Wan JJ, Kielian M.** 2018. The Alphavirus Exit Pathway: What We Know and What We Wish We Knew. *Viruses* **10**.
  67. **Tellinghuisen TL, Perera R, Kuhn RJ.** 2001. In vitro assembly of Sindbis virus core-like particles from cross-linked dimers of truncated and mutant capsid proteins. *J Virol* **75**:2810-2817.
  68. **Warrier R, Linger BR, Golden BL, Kuhn RJ.** 2008. Role of sindbis virus capsid protein region II in nucleocapsid core assembly and encapsidation of genomic RNA. *J Virol* **82**:4461-4470.
  69. **Perera R, Owen KE, Tellinghuisen TL, Gorbalenya AE, Kuhn RJ.** 2001. Alphavirus nucleocapsid protein contains a putative coiled coil alpha-helix important for core assembly. *J Virol* **75**:1-10.

Standard  
CLP assay

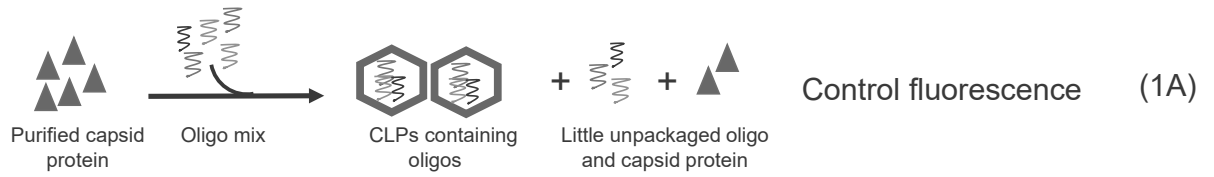

Modulators of CLP assembly

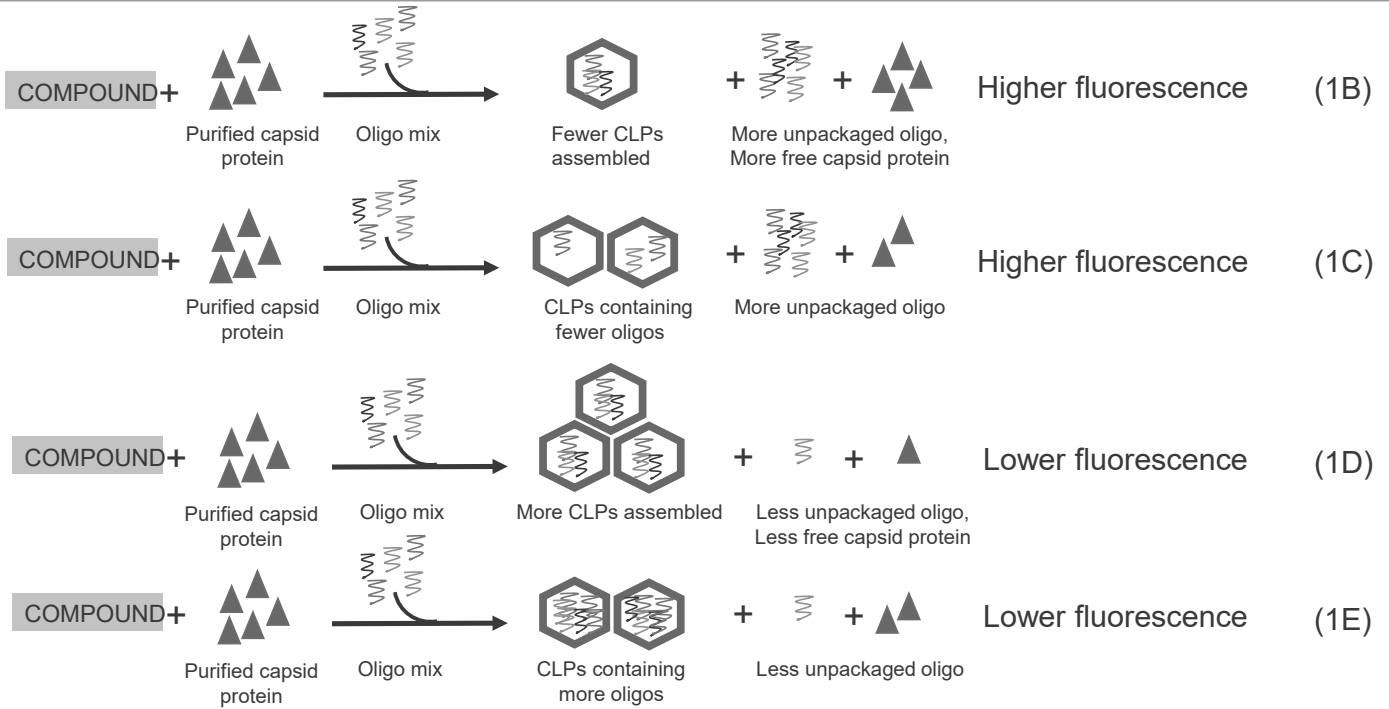

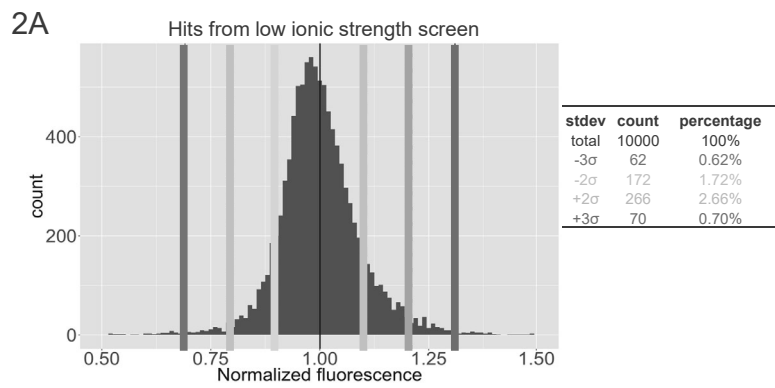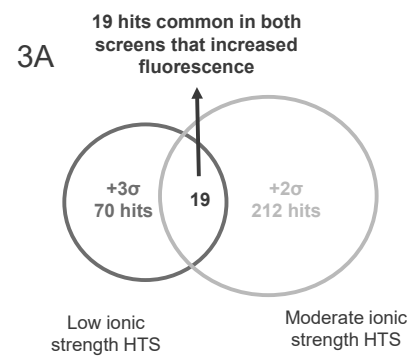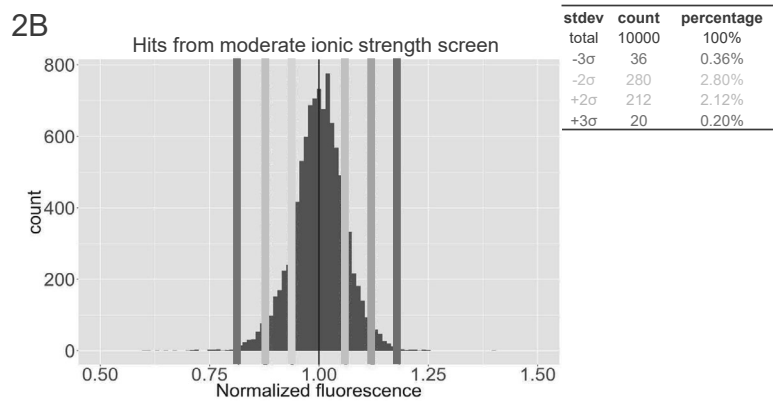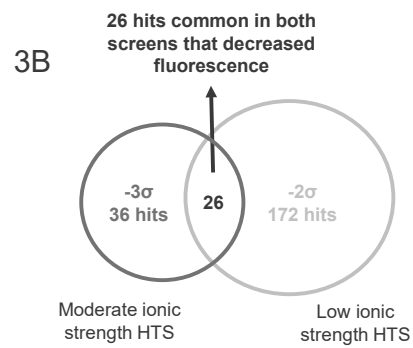

4

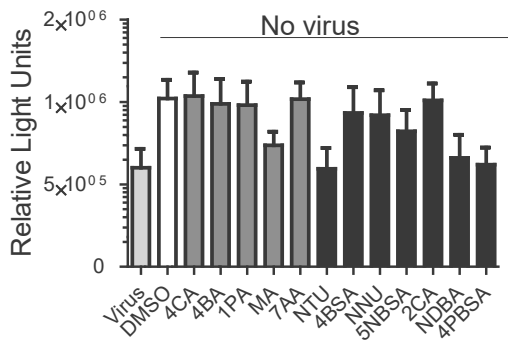

5A

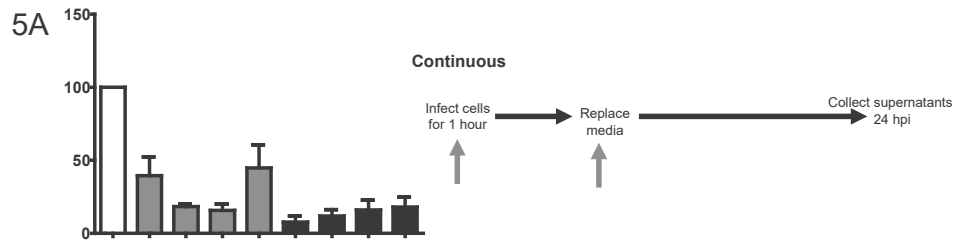

B

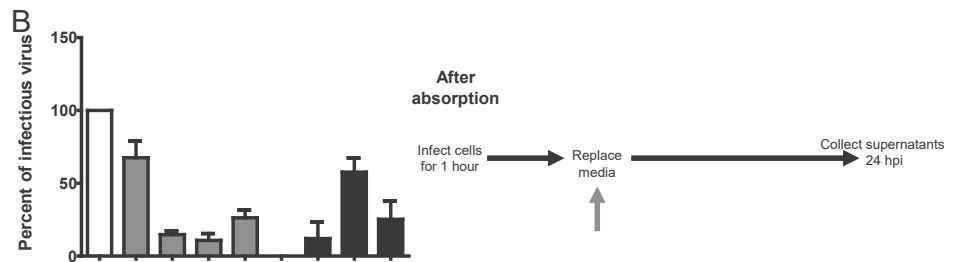

C

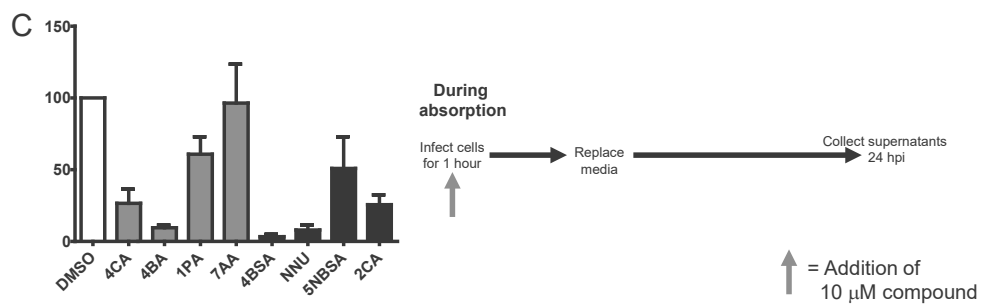

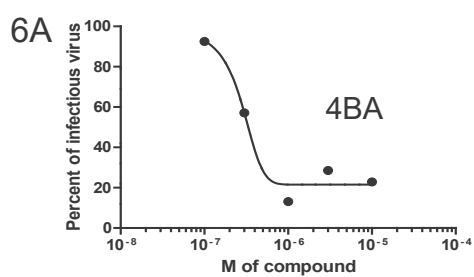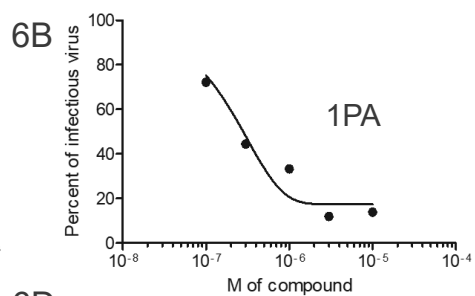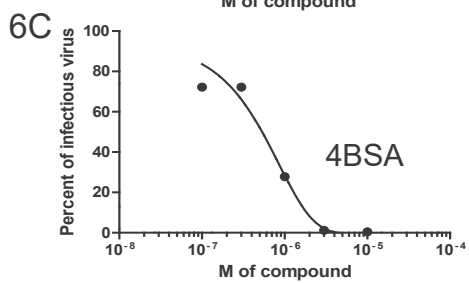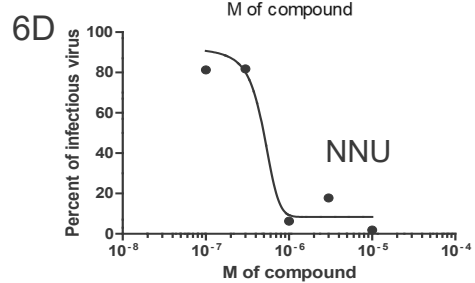

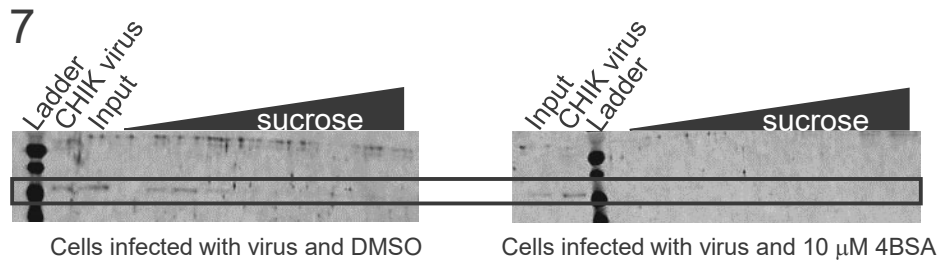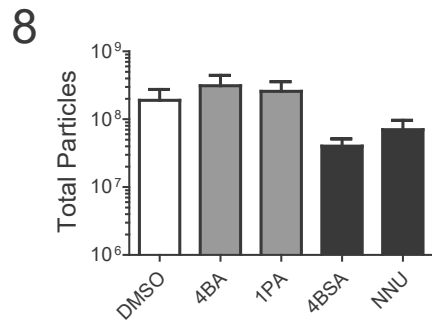



Supplemental figures

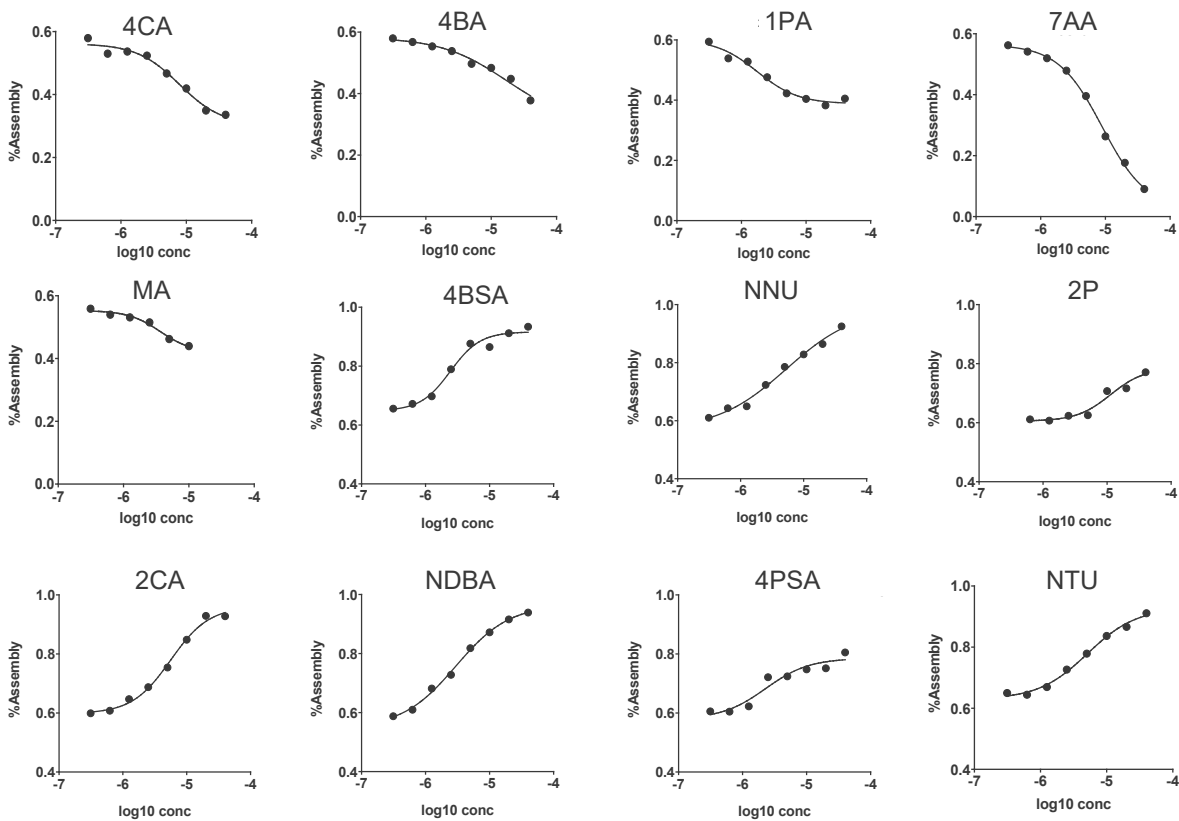

**Supplemental Figure 1.** Forty-five of the CLP modulators identified in the HTS were validated by determining CLP assembly *in vitro* as a function of compound concentration. An increase in fluorescence signal correlated to low assembly and a decrease in fluorescence signal correlates to high assembly. Dose response of compounds that increase fluorescence were tested at 320 mM NaCl and dose response of compounds that decrease were tested at 570 mM. The twelve compounds shown here were selected to be further tested in tissue culture assays using intact CHIK virus.

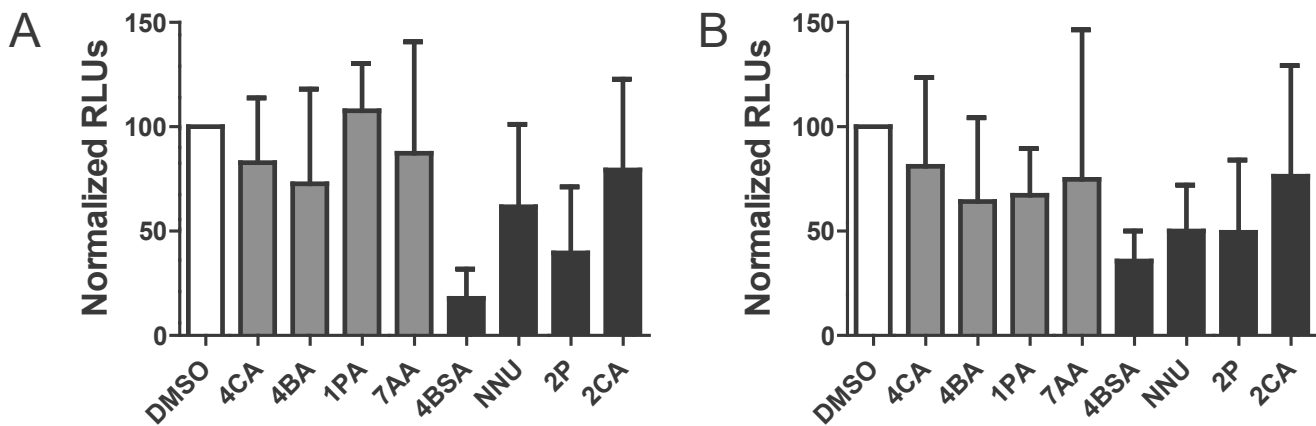

**Supplemental Figure 2. Sensitivity of reporter gene assays to compounds identified by the assembly assay.** BHK cells were infected with CHIKV nsP3:luciferase (A) or capsid:luciferase (B) and 10  $\mu$ M of compound was added immediately after virus absorption. Cells lysates were assessed for luciferase either 6 hpi (A) or 9 hpi (B). These data are averaged from 3 independent experiments; each performed in triplicate. Medium gray and black bars represent compounds identified in the inhibitor or promoter screen, respectively.
